# Supplementary material for: Scalable preparation of nitrogen-enriched carbon microspheres for efficient CO2 capture
Source: Royal Society of Chemistry journal article supplement (doi:10.1039/c4ra11647j), 2014-01-01
Supplement: c4ra11647j1.pdf [file c4ra11647j1.pdf]

## Supporting Online Material for

### Scalable Preparation of Nitrogen-enriched Carbon Microspheres for Efficient CO<sub>2</sub> Capture

Mei Wang, Jitong Wang, Wenming Qiao, Licheng Ling and Donghui Long\*

State Key Laboratory of Chemical Engineering, East China University of Science and Technology,

Shanghai 200237

\*To whom correspondence should be addressed. E-mail: [longdh@ecust.edu.cn](mailto:longdh@ecust.edu.cn)

#### **This PDF file includes:**

Figs. S1

Table S1

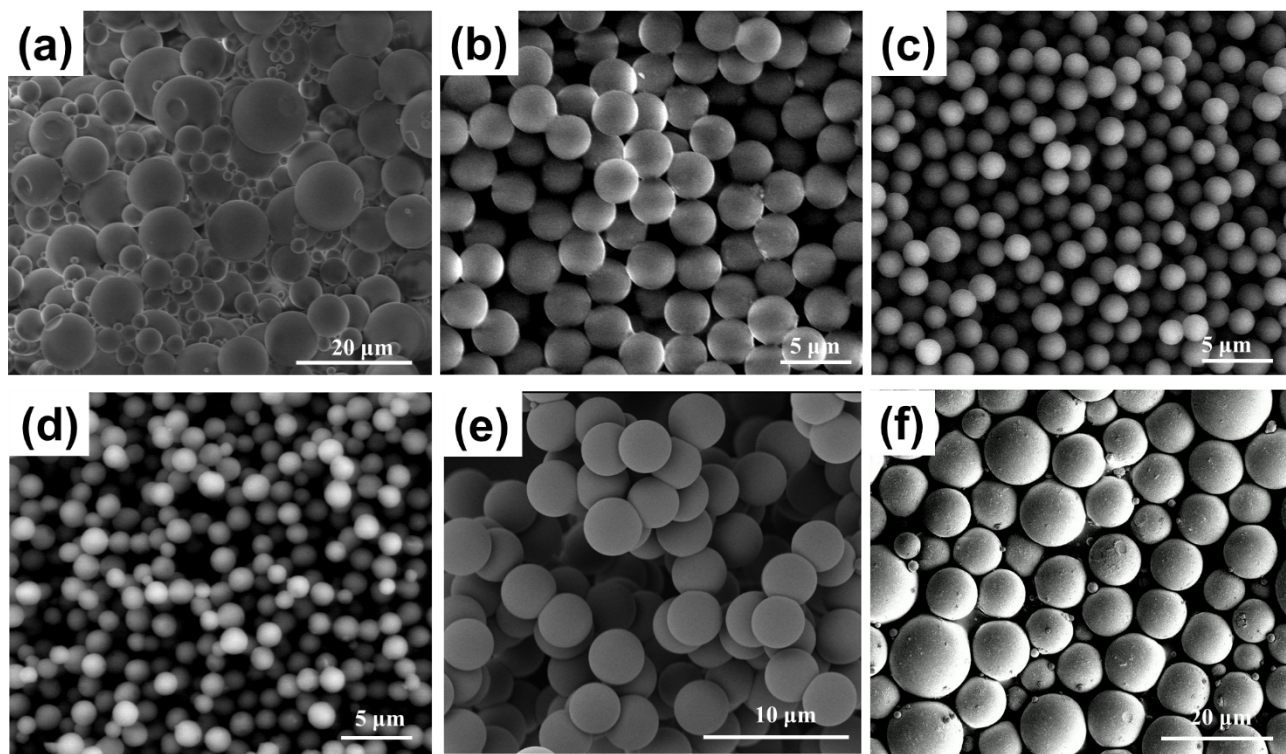

**Fig. S1.** SEM images of MRF polymer microspheres: RF (a), MRF1 (b), MRF2 (c), MRF3 (d), MRF5 (e) and MF (f)

**Table S1** Chemical composition of MRF polymer microsphere measured by elemental analysis

| Samples | CHN analysis   |           |           |           |           |
|---------|----------------|-----------|-----------|-----------|-----------|
|         | N/C<br>at./at. | N<br>wt.% | C<br>wt.% | H<br>wt.% | O<br>wt.% |
| RF      | 0              | 0         | 60.19     | 3.48      | 33.67     |
| MRF1    | 0.43           | 26.02     | 46.07     | 4.69      | 23.22     |
| MRF2    | 0.60           | 30.72     | 41.96     | 4.65      | 22.67     |
| MRF3    | 0.69           | 34.16     | 40.01     | 4.77      | 21.06     |
| MRF5    | 0.99           | 39.23     | 38.89     | 4.56      | 17.32     |
| MF      | 1.04           | 44.55     | 36.52     | 5.10      | 13.83     |
